# Supplementary material for: Direct enantioseparation of 1-(2-hydroxyphenyl) ethylamines via diastereomeric salt formation: chiral recognition mechanism based on the crystal structure
Source: Royal Society of Chemistry journal article supplement (doi:10.1039/c4ra00414k), 2014-01-01

## Supporting Information

### **Direct enantioseparation of 1-(2-hydroxyphenyl)ethylamines via diastereomeric salt formation: chiral recognition mechanism based on the crystal structure**

Koichi Kodama\*, Naoki Hayashi, Mikidai Fujita and Takuji Hirose

*Graduate School of Science and Engineering, Saitama University,*

*255 Shimo-Ohkubo, Sakura, Saitama 338-8570, Japan*

#### **Table of Contents**

|                                                                                    |         |
|------------------------------------------------------------------------------------|---------|
| Thermogravimetric analysis of the diastereomeric salt <b>1a 6</b> (Figure S1)      | S2      |
| Copies of <sup>1</sup> H and <sup>13</sup> C NMR spectra of the reported compounds | S3 – S9 |

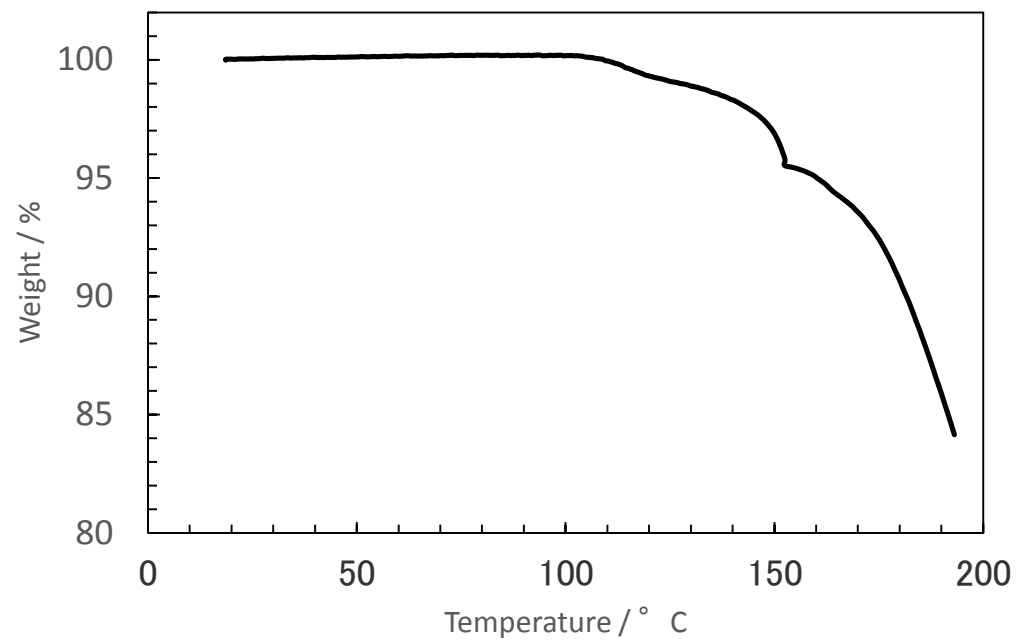

Figure S1. TGA chart of **1a·6** obtained from 50% aqueous EtOH solution.

1H

7.255  
7.157  
7.154  
7.141  
7.139  
7.127  
7.123  
6.971  
6.968  
6.956  
6.953  
6.844  
6.842  
6.828  
6.826  
6.787  
6.785  
6.772  
6.770  
6.757  
6.755  
4.342  
4.329  
4.316  
4.302

1.482  
1.469

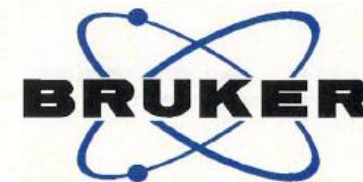

NAME kodama  
EXPNO 7  
PROCNO 1  
Date\_ 20121213  
Time\_ 20.24  
INSTRUM spect  
PROBHD 5 mm PABBO BB-  
PULPROG zg30  
TD 65536  
SOLVENT CDCl3  
NS 8  
DS 2  
SWH 10330.578 Hz  
FIDRES 0.157632 Hz  
AQ 3.1719923 sec  
RG 144  
DW 48.400 usec  
DE 6.50 usec  
TE 299.5 K  
D1 1.00000000 sec  
TD0 1

----- CHANNEL f1 -----  
NUC1 1H  
P1 11.80 usec  
PL1 2.40 dB  
PL1W 15.17711735 W  
SFO1 500.0330885 MHz  
SI 32768  
SF 500.0300133 MHz  
WDW EM  
SSB 0  
LB 0.30 Hz  
GB 0  
PC 1.00

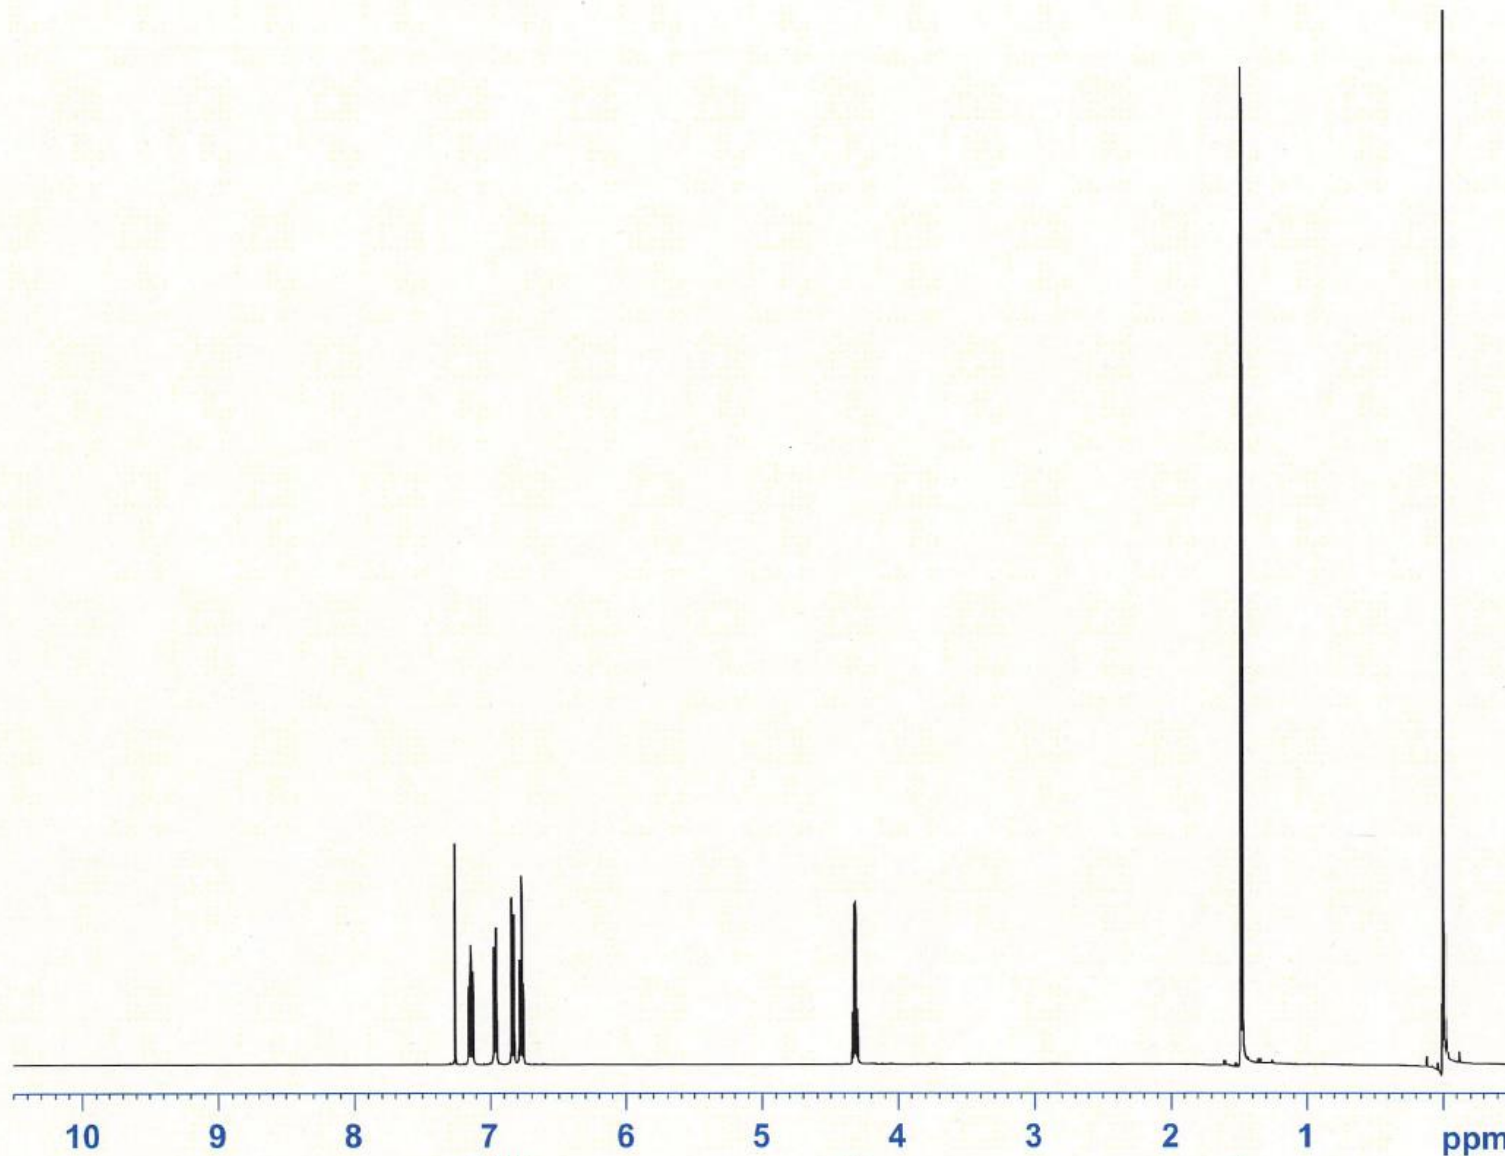

0.974  
0.986  
0.954  
0.980

1.000

3.060

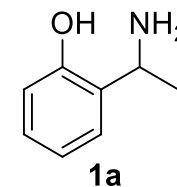

13C with 1H decoupling

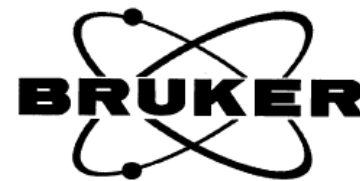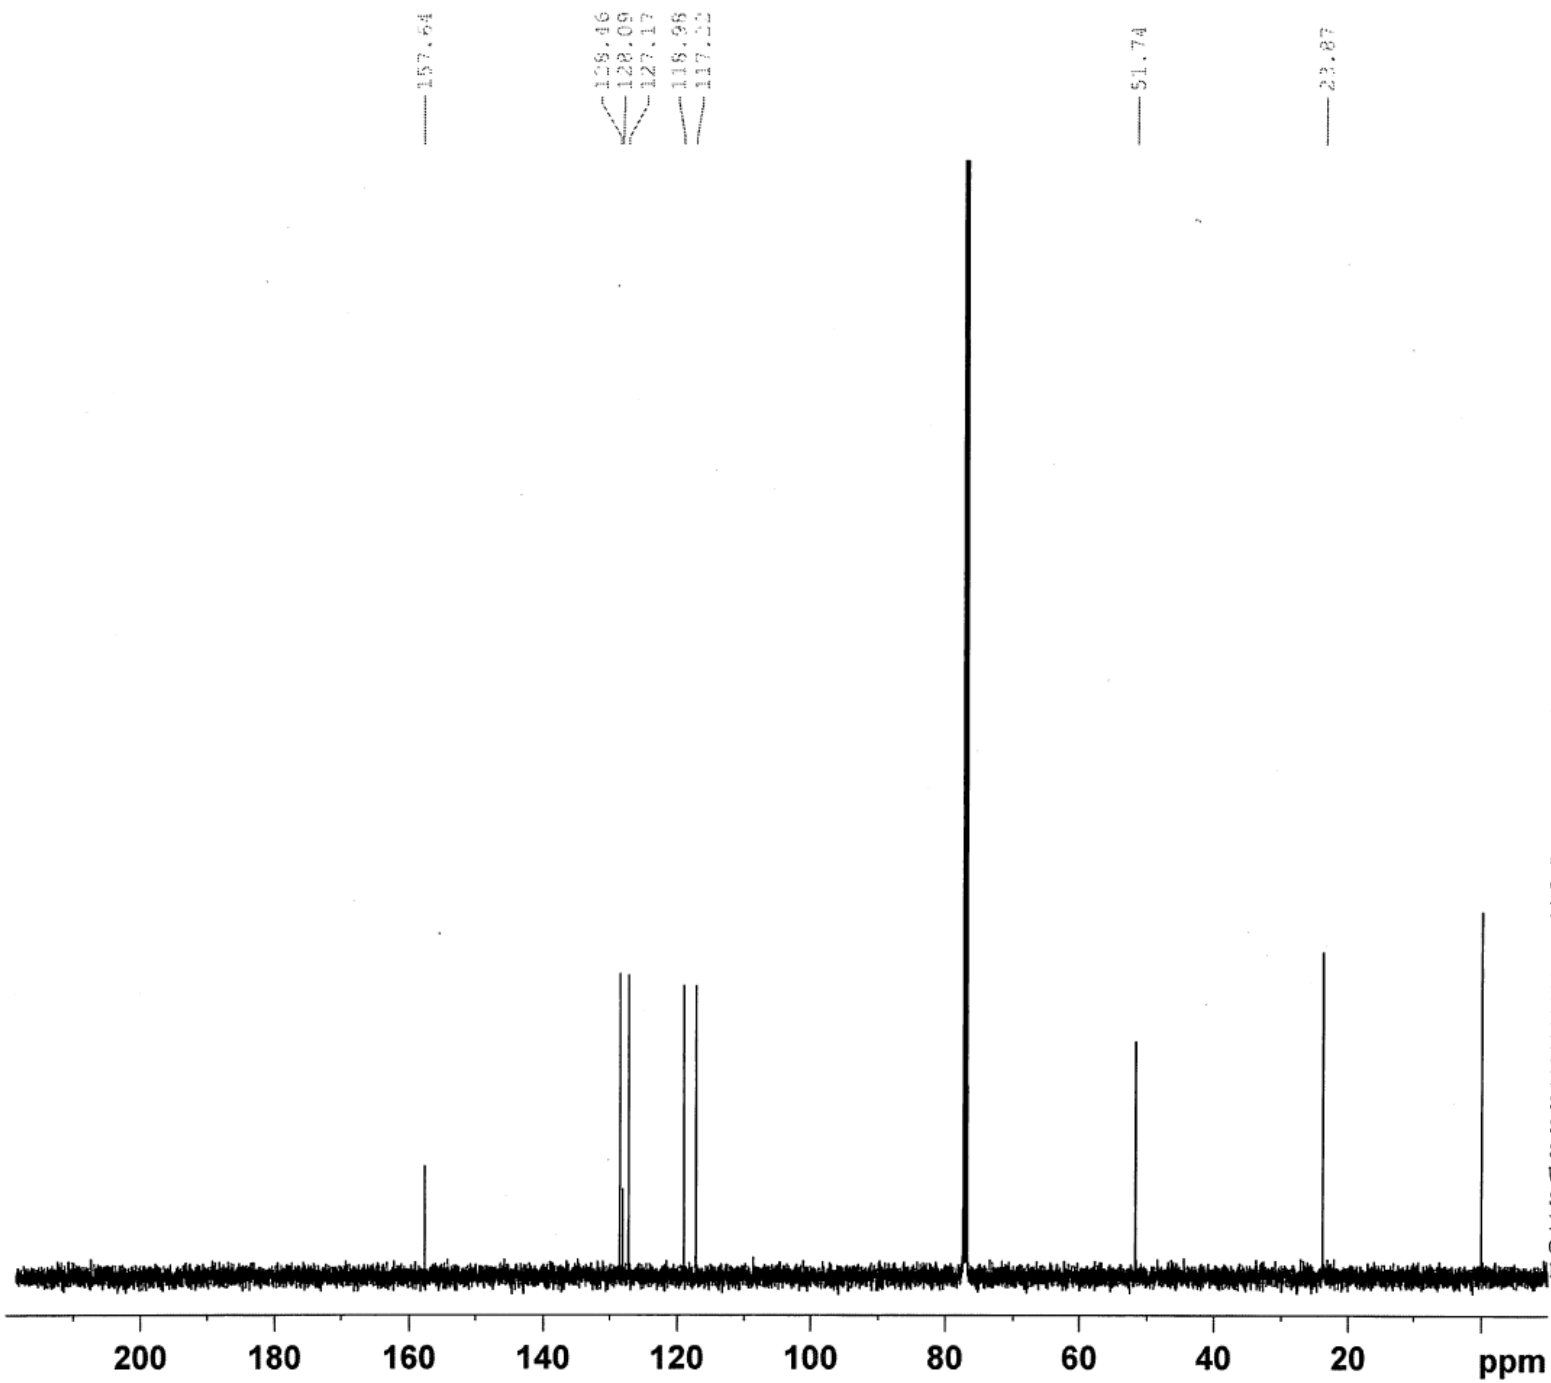

NAME kodama  
EXPNO 2  
PROCNO 1  
Date\_ 20121213  
Time\_ 21.36  
INSTRUM spect  
PROBHD 5 mm PABBO BB-  
PULPROG zgpg30  
TD 65536  
SOLVENT CDC13  
NS 202  
DS 4  
SWH 29761.904 Hz  
FIDRES 0.454131 Hz  
AQ 1.1010548 sec  
RG 203  
DW 16.800 usec  
DE 6.50 usec  
TE 300.4 K  
D1 2.00000000 sec  
D11 0.03000000 sec  
TD0 1

===== CHANNEL f1 =====  
NUC1 13C  
P1 10.00 usec  
PL1 -0.30 dB  
PL1W 93.66541290 W  
SFO1 125.7703643 MHz

===== CHANNEL f2 =====  
CPDPRG2 waltz16  
NUC2 1H  
PCPD2 80.00 usec  
PL2 1.75 dB  
PL12 19.50 dB  
PL13 19.50 dB  
PL2W 18.63472366 W  
PL12W 0.31284049 W  
PL13W 0.31284049 W  
SFO2 500.1320005 MHz  
SI 32768  
SF 125.7577896 MHz  
WDW EM  
SSB 0  
LB 1.00 Hz  
GB 0  
PC 1.40

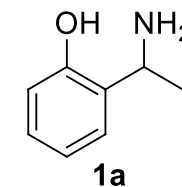

1H

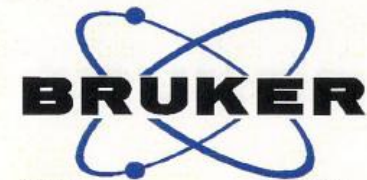

NAME kodama  
EXPNO 6  
PROCNO 1  
Date\_ 20121109  
Time 10.51  
INSTRUM spect  
PROBHD 5 mm PABBO BB-  
PULPROG zg30  
TD 65536  
SOLVENT CDCl3  
NS 8  
DS 2  
SWH 10330.578 Hz  
FIDRES 0.157632 Hz  
AQ 3.1719923 sec  
RG 144  
DW 48.400 usec  
DE 6.50 usec  
TE 299.5 K  
D1 1.00000000 sec  
TD0 1

==== CHANNEL f1 =====  
NUC1 1H  
P1 11.80 usec  
PL1 2.40 dB  
PL1W 15.17711735 W  
SFO1 500.0330885 MHz  
SI 32768  
SF 500.0300142 MHz  
WDW EM  
SSB 0  
LB 0.30 Hz  
GB 0  
PC 1.00

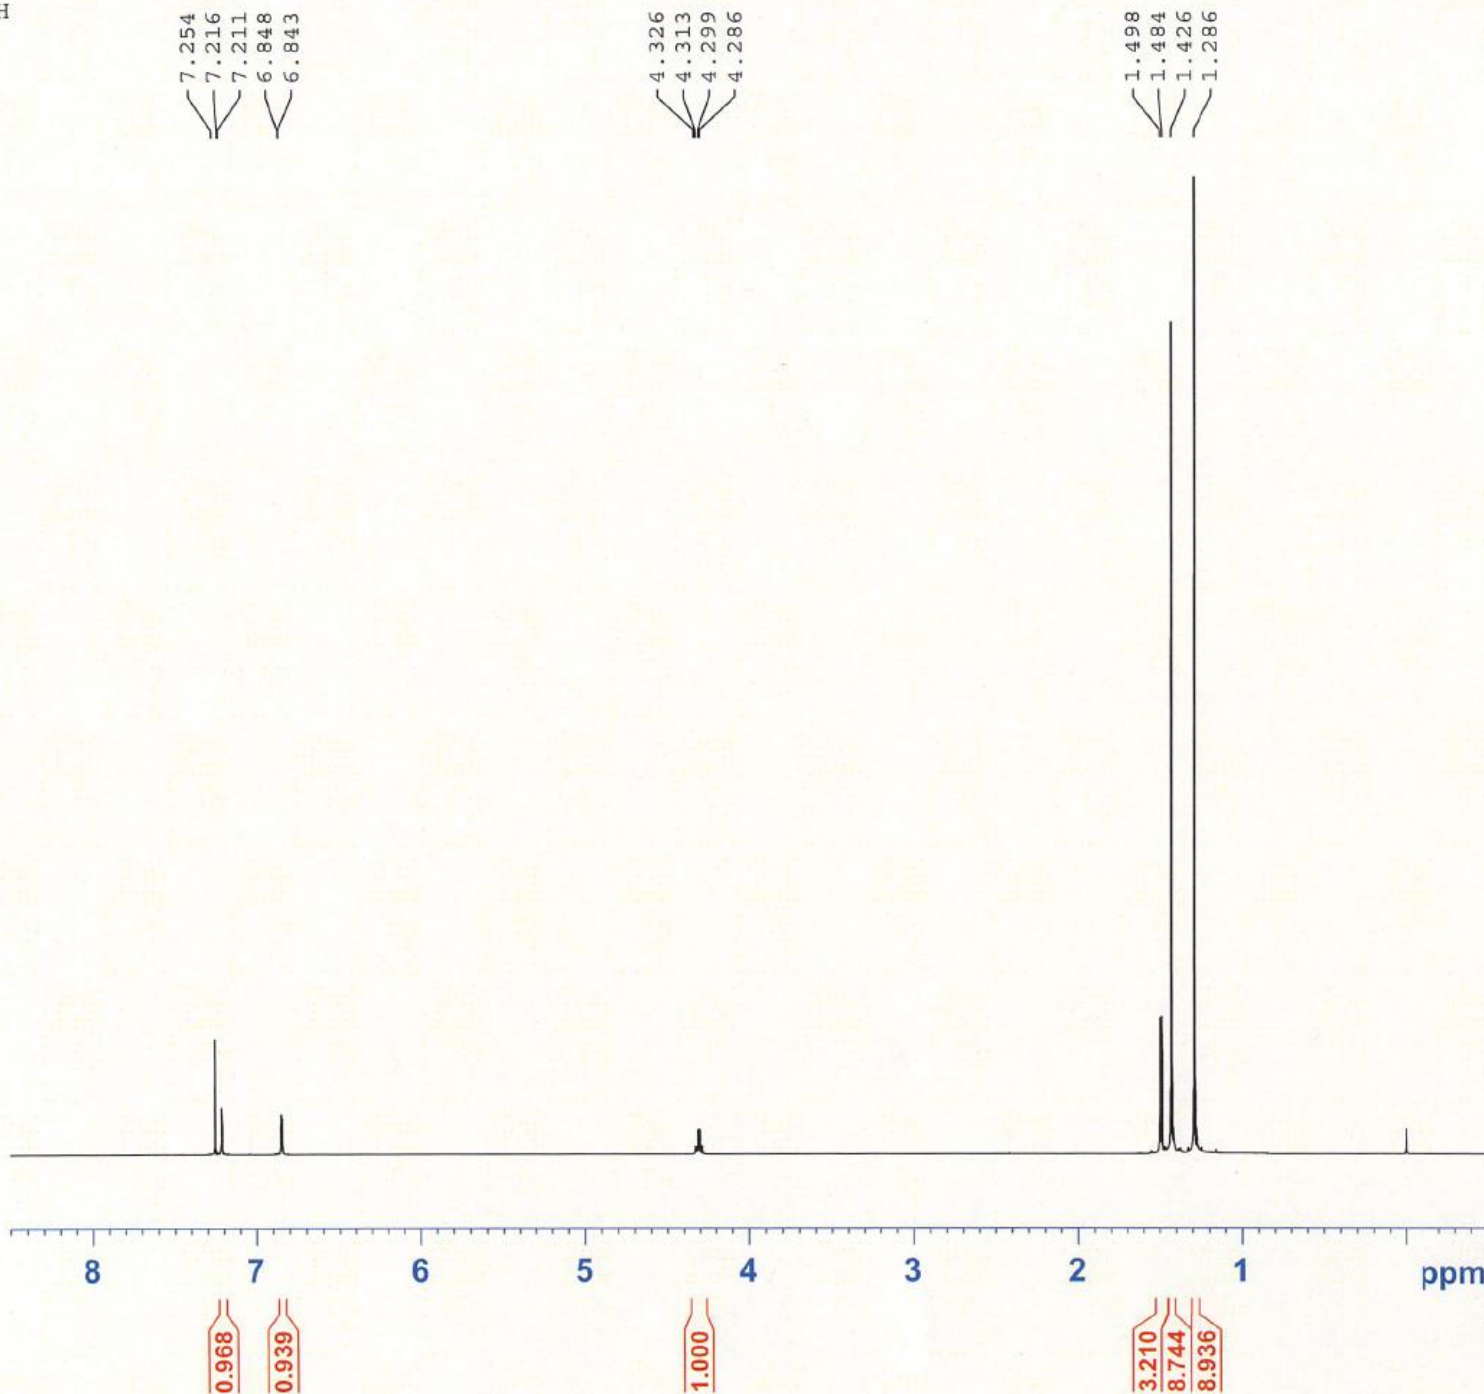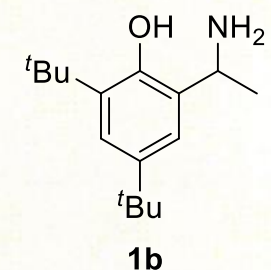



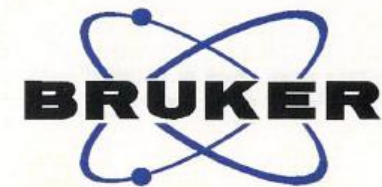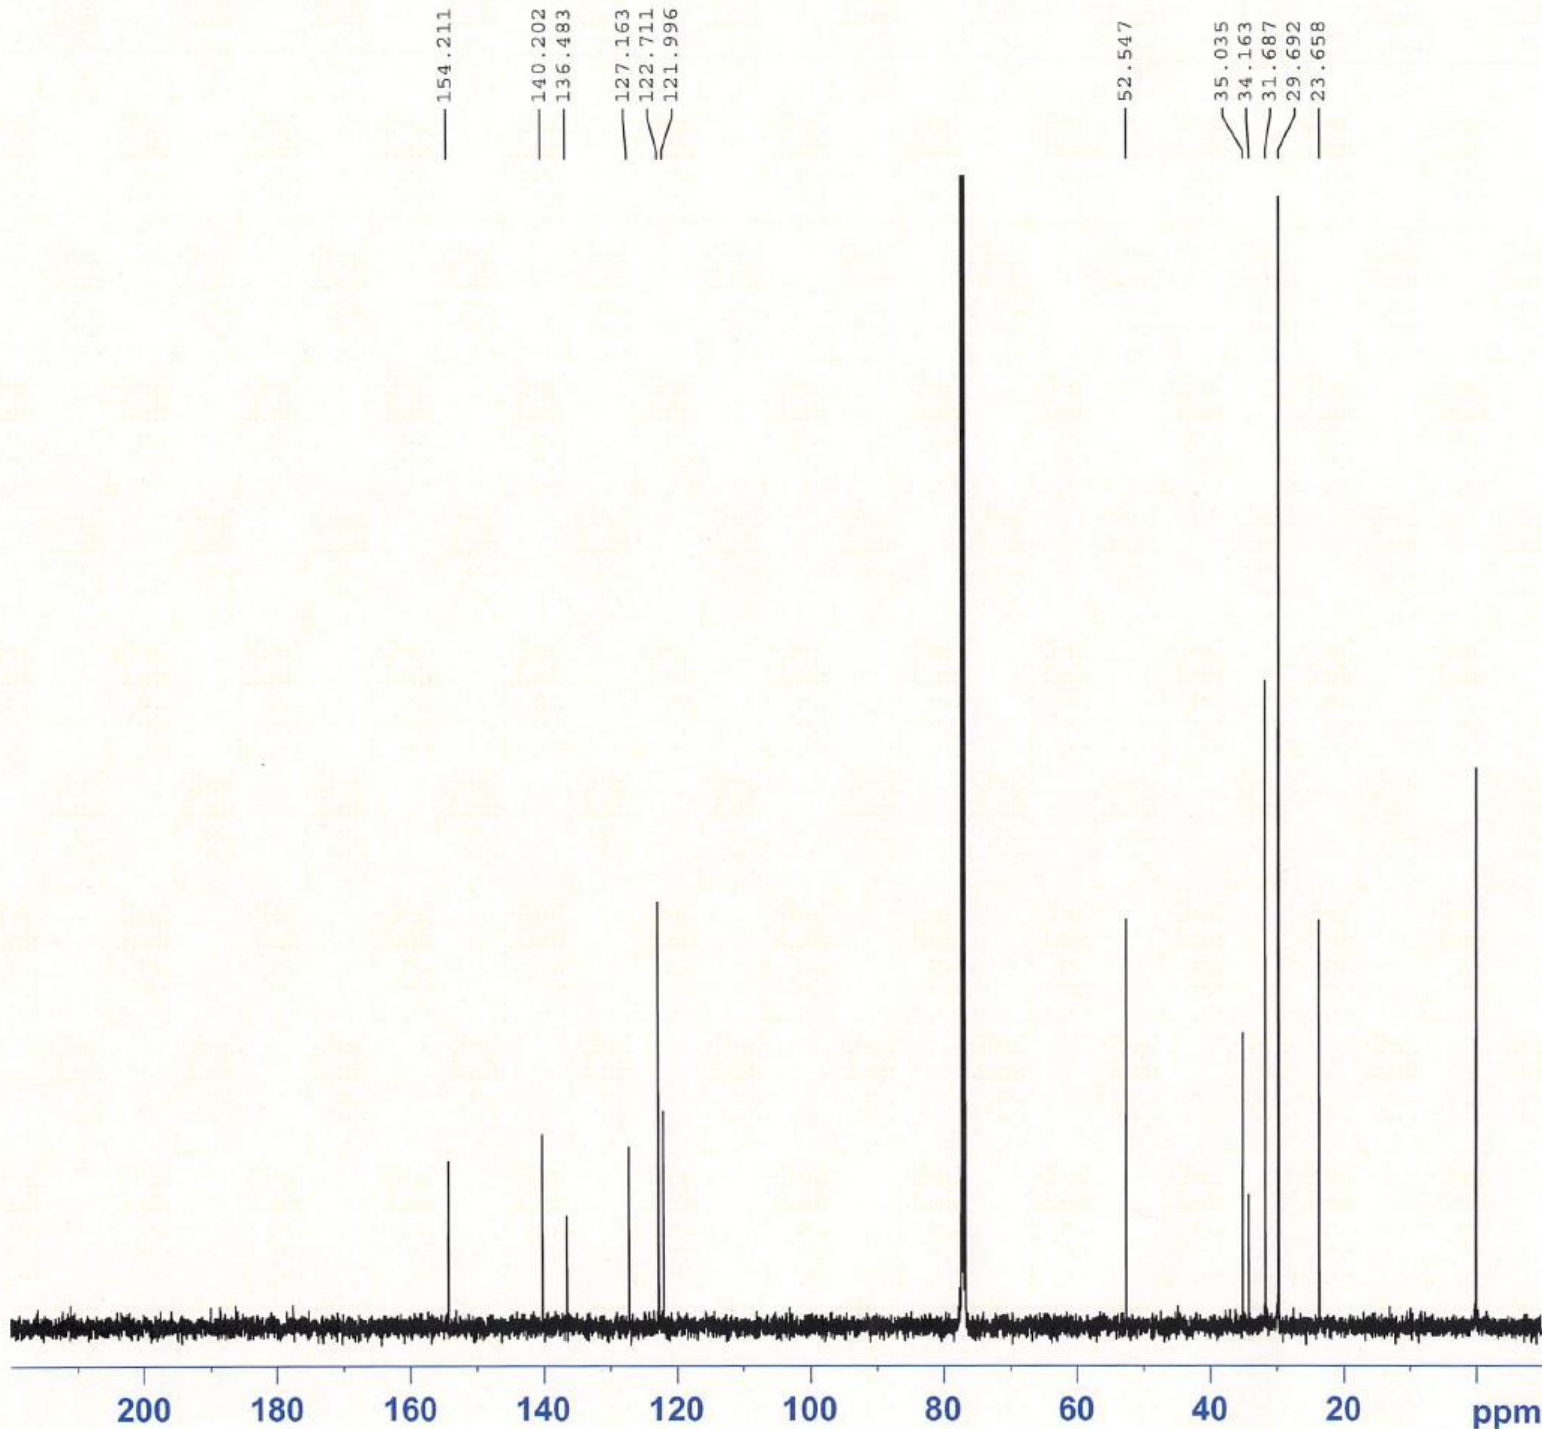

NAME kodama  
EXPNO 17  
PROCNO 1  
Date\_ 20121116  
Time 21.52  
INSTRUM spect  
PROBHD 5 mm PABBO BB-  
PULPROG zgpg30  
TD 65536  
SOLVENT CDCl3  
NS 1024  
DS 2  
SWH 40760.871 Hz  
FIDRES 0.621962 Hz  
AQ 0.8039582 sec  
RG 203  
DW 12.267 usec  
DE 6.50 usec  
TE 300.6 K  
D1 2.00000000 sec  
D11 0.03000000 sec  
TDO 1

==== CHANNEL f1 =====  
NUC1 13C  
P1 9.80 usec  
PL1 0.00 dB  
PL1W 100.47545624 W  
SFO1 125.7477319 MHz

==== CHANNEL f2 =====  
CPDPRG2 waltz16  
NUC2 1H  
PCPD2 80.00 usec  
PL2 2.40 dB  
PL12 19.02 dB  
PL13 22.02 dB  
PL2W 15.17711735 W  
PL12W 0.33051354 W  
PL13W 0.16564916 W  
SFO2 500.0316016 MHz  
SI 16384  
SF 125.7326453 MHz  
WDW EM  
SSB 0  
LB 21.00 Hz  
GB 0  
PC 1.40

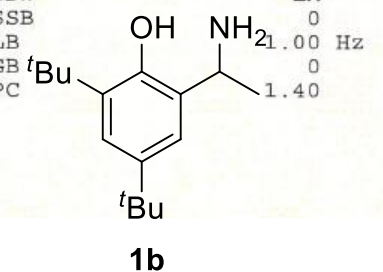

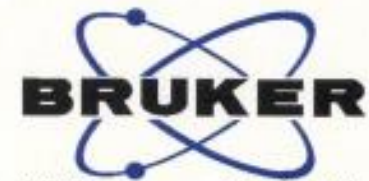

NAME A13my019nh  
EXPNO 14022807  
PROCNO 1  
Date\_ 20140228  
Time\_ 18.34  
INSTRUM spect  
PROBHD 5 mm PABBO BB-  
PULPROG zg30  
TD 65536  
SOLVENT CDCl3  
NS 8  
DS 2  
SWH 6188.119 Hz  
FIDRES 0.094423 Hz  
AQ 5.2953587 sec  
RG 203  
DW 80.800 usec  
DE 6.50 usec  
TE 295.5 K  
D1 1.00000000 sec  
TD0 1

----- CHANNEL f1 -----  
NUC1 1H  
P1 15.00 usec  
PL1 1.20 dB  
PL1W 8.19348145 W  
SFO1 300.1318534 MHz  
SI 32768  
SF 300.1299823 MHz  
WDW EM  
SSB 0  
LB 0.30 Hz  
GB 0  
PC 1.00

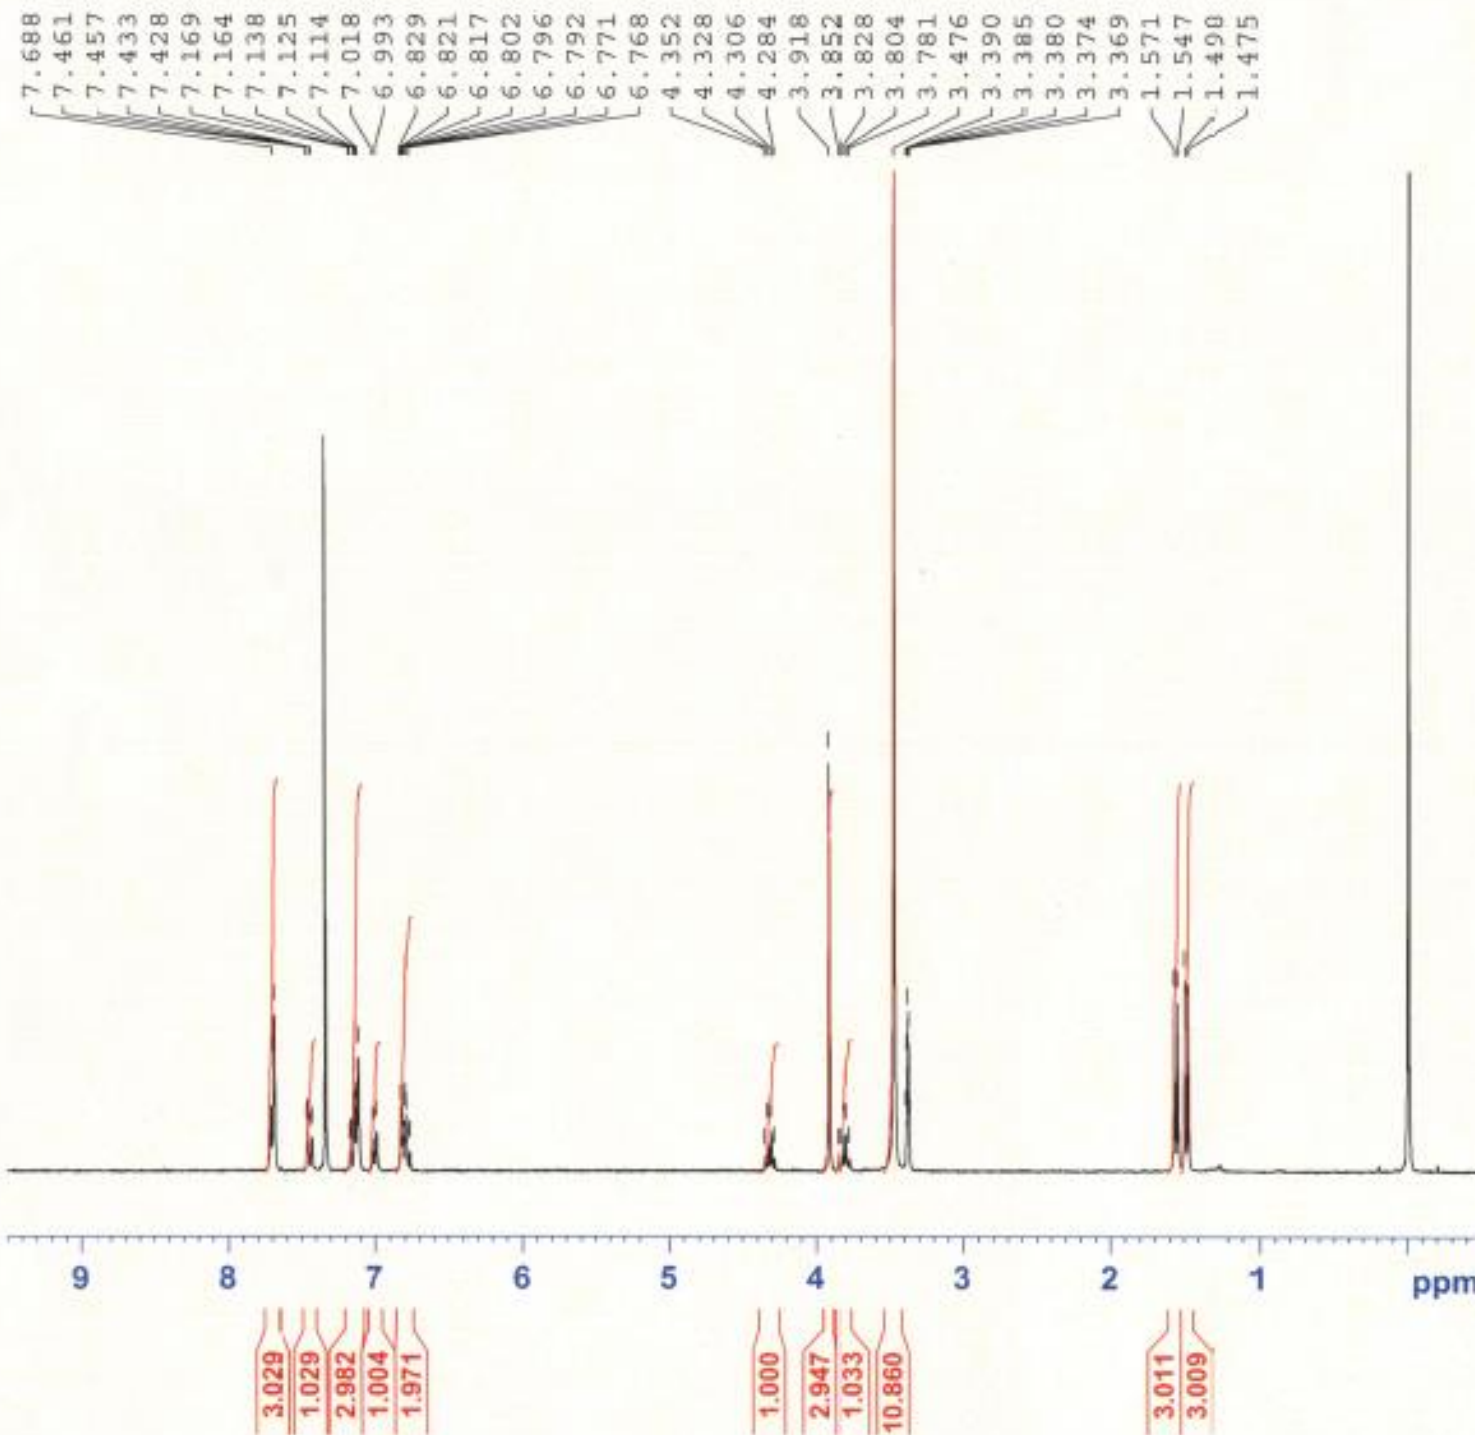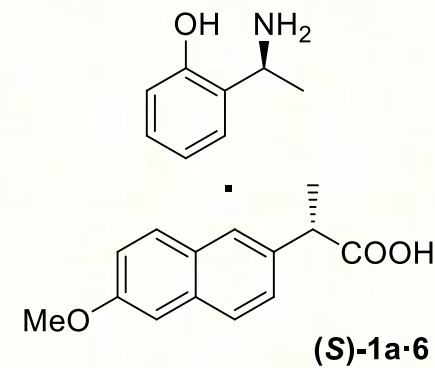

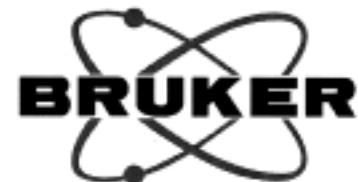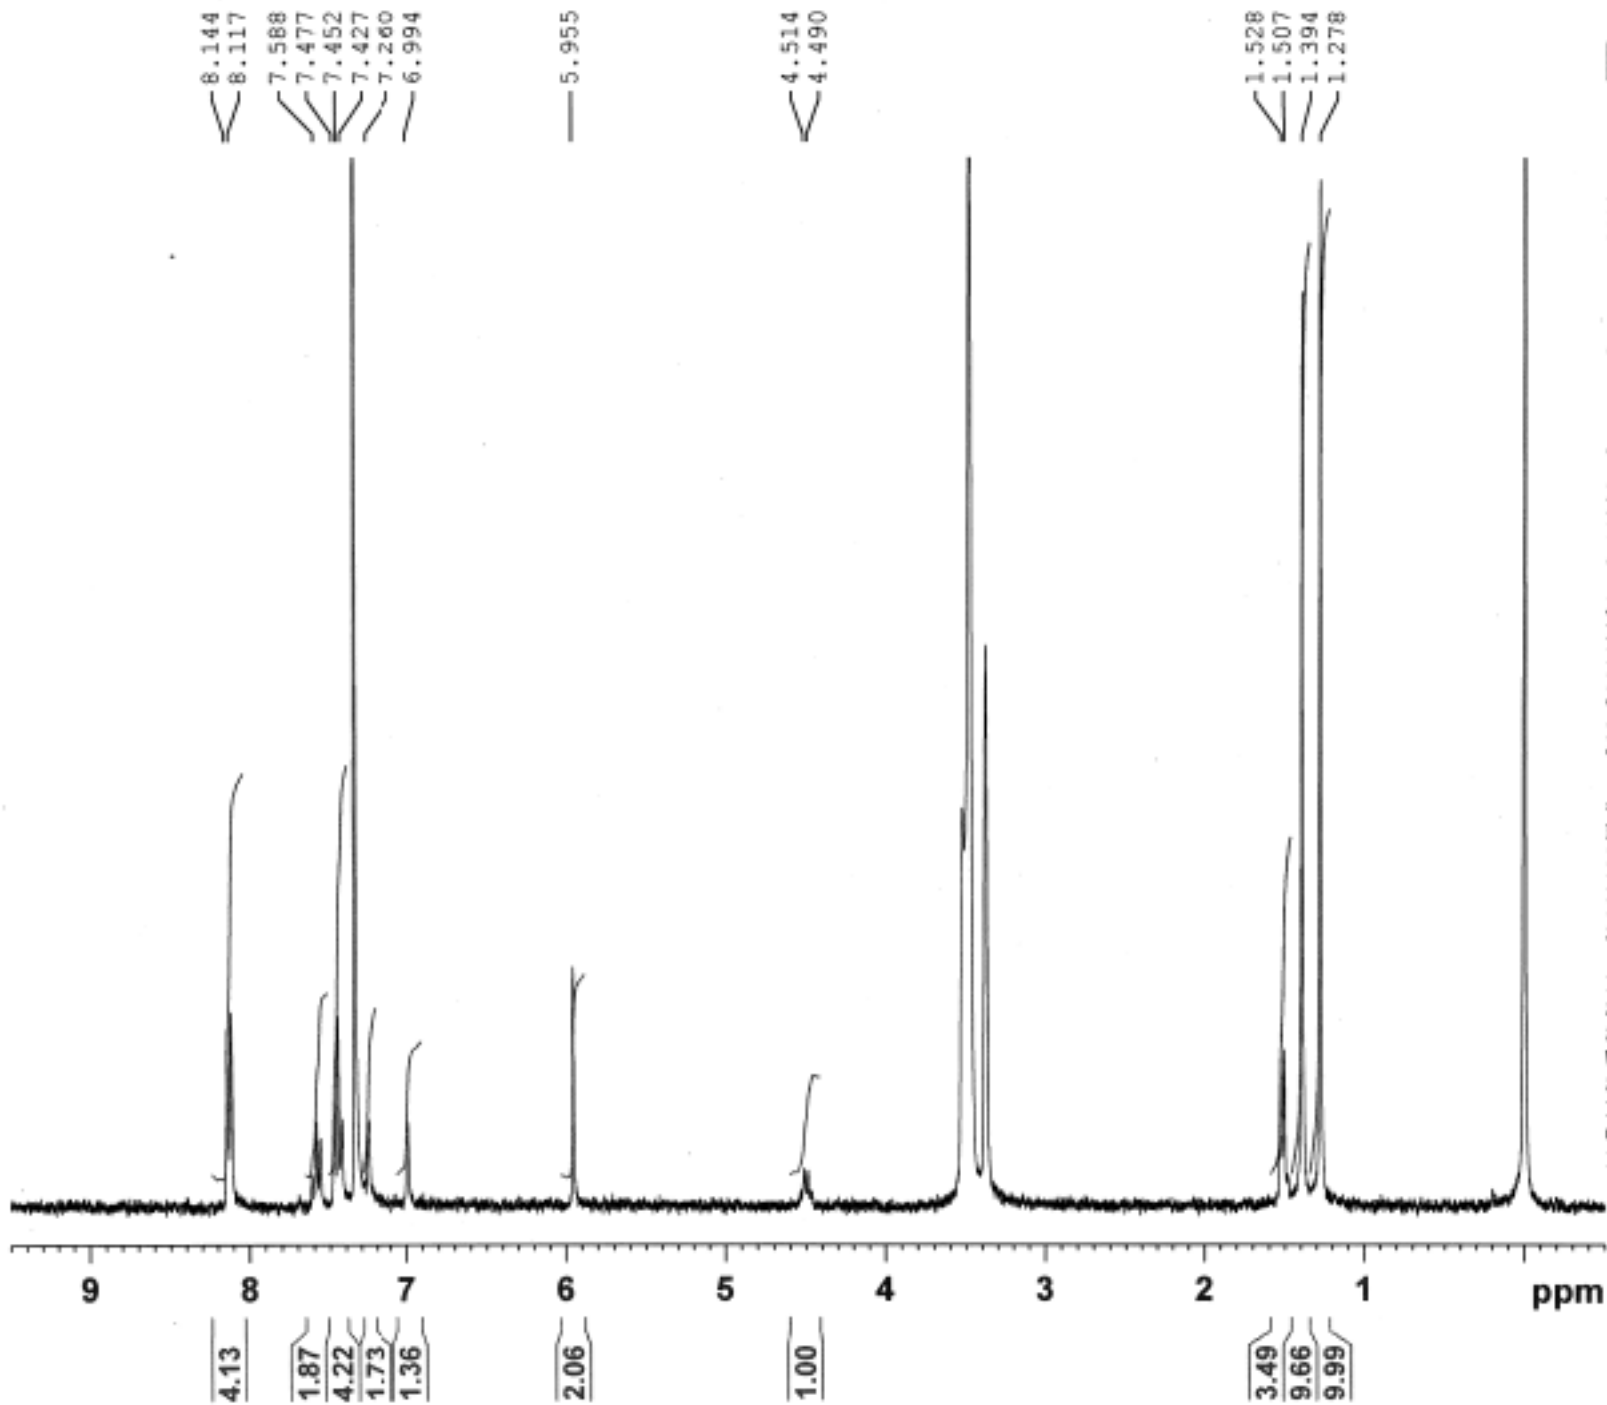

Current Data Parameters  
 NAME A08ta054aa  
 EXPNO 29  
 PROCNO 1

F2 - Acquisition Parameters  
 Date\_ 20110909  
 Time\_ 9.25  
 INSTRUM spect  
 PROBHD 5 mm PABBO BB-  
 PULPROG zg30  
 TD 65536  
 SOLVENT CDCl3  
 NS 8  
 DS 2  
 SWH 6188.119 Hz  
 FIDRES 0.094423 Hz  
 AQ 5.2953587 sec  
 RG 203  
 DW 80.800 usec  
 DE 6.50 usec  
 TE 296.5 K  
 D1 1.00000000 sec  
 TD0 1

----- CHANNEL f1 -----  
 NUC1 1H  
 P1 15.00 usec  
 PL1 1.20 dB  
 PL1W 8.19348145 W  
 SFO1 300.1318534 MHz

F2 - Processing parameters  
 SI 32768  
 SF 300.1299808 MHz  
 WDW EM  
 SSB 0  
 LB 0.30 Hz  
 GB 0  
 PC 1.00

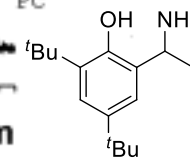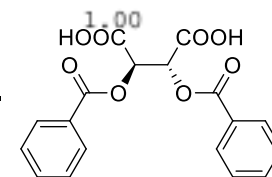

1b-5



7.435  
7.287  
7.279  
7.055  
7.047

4.589  
4.566  
4.544  
4.522  
4.280  
4.177  
4.158  
4.147  
4.129  
2.535  
2.514  
2.506  
2.495  
2.484  
2.477  
2.467  
2.462  
2.455  
2.450  
2.444  
2.432  
2.426  
2.415  
2.387  
2.377  
2.370  
2.358  
2.353  
2.337  
2.323  
2.297  
2.267  
2.224  
2.204  
2.191  
2.184  
2.171  
2.164  
2.160  
2.153  
2.141  
2.136  
2.132  
1.585  
1.562  
1.426  
1.300

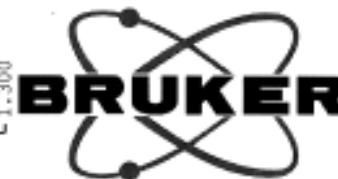

Current Data Parameters  
NAME A08ta054aa  
EXPNO 30  
PROCNO 1

F2 - Acquisition Parameters  
Date\_ 20111007  
Time\_ 15.38  
INSTRUM spect  
PROBHD 5 mm PABBO BB-  
PULPROG zg30  
TD 65536  
SOLVENT CDCl3  
NS 8  
DS 2  
SWH 6188.119 Hz  
FIDRES 0.094423 Hz  
AQ 5.2953587 sec  
RG 203  
DW 80.800 usec  
DE 6.50 usec  
TE 295.8 K  
D1 1.00000000 sec  
TD0 1

----- CHANNEL f1 -----  
NUC1 1H  
P1 15.00 usec  
PL1 1.20 dB  
PL1W 8.19348145 W  
SFO1 300.1318534 MHz

F2 - Processing parameters  
SI 32768  
SF 300.1311721 MHz  
WDW EM  
SSB 0  
LB 0.30 Hz  
GB 0  
PC 1.00

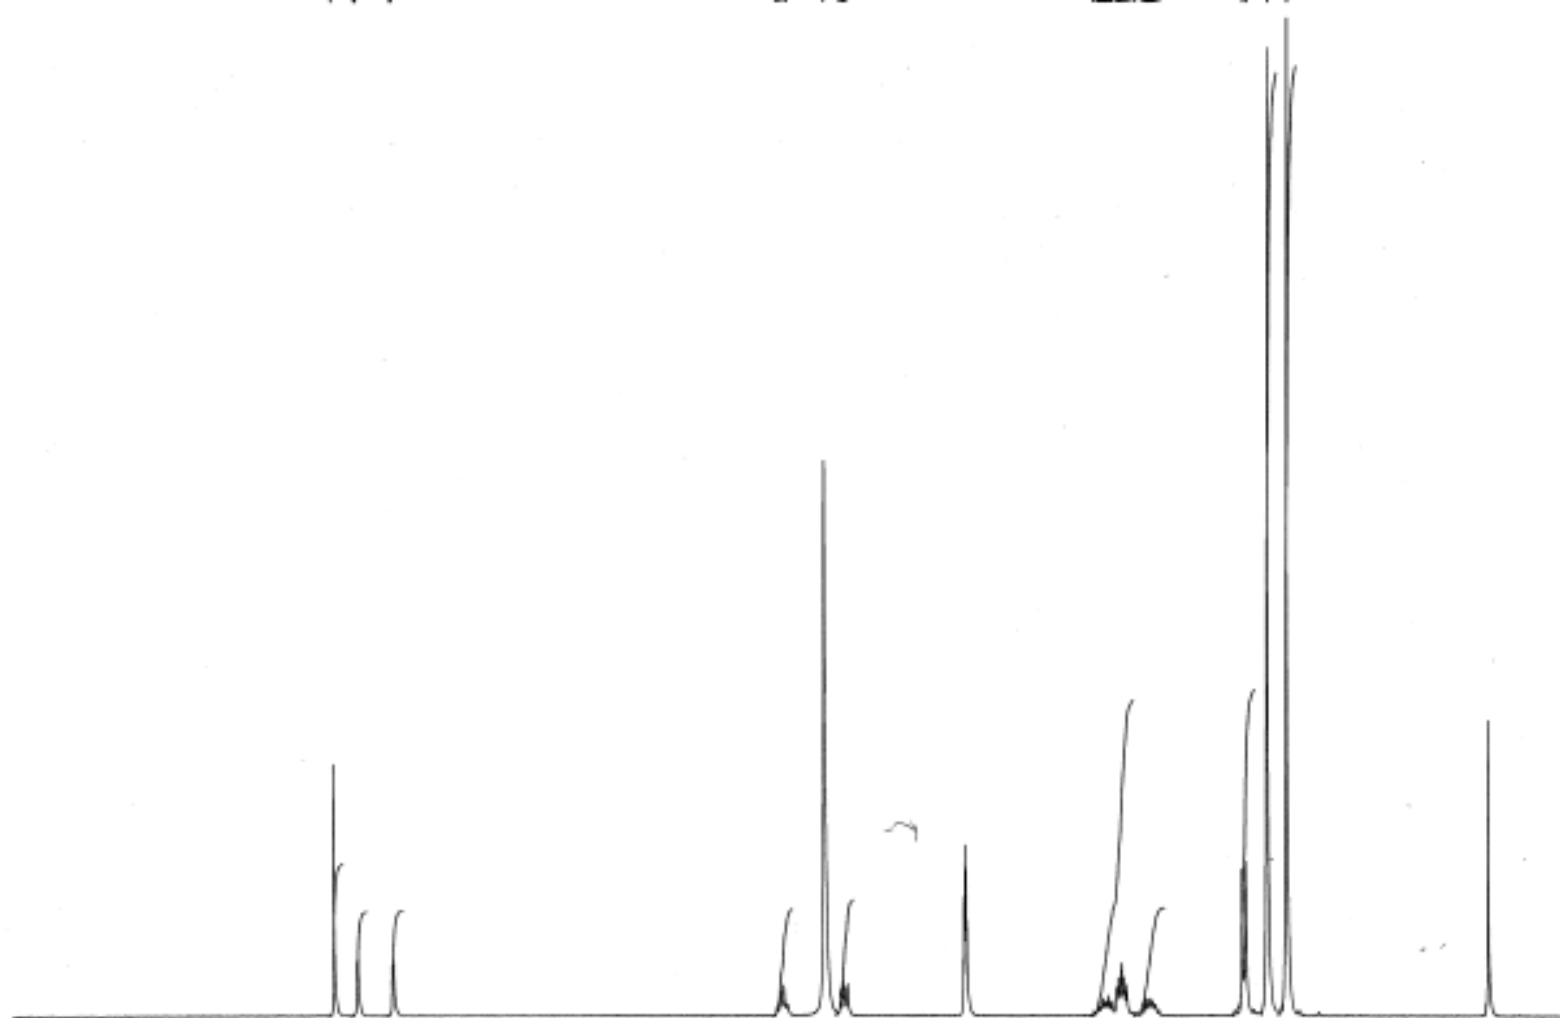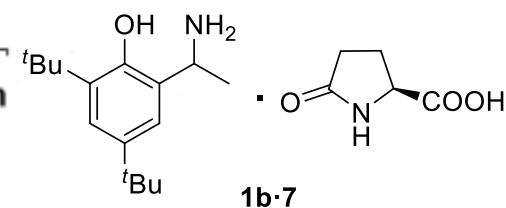

Supplement: c4ra00414k1.pdf [file c4ra00414k1.pdf]
